# Supplementary material for: Natural history of fibrodysplasia ossificans progressiva: cross-sectional analysis of annotated baseline phenotypes
Source: Springer Nature journal article supplement (doi:10.1186/s13023-019-1068-7), 2019-05-03

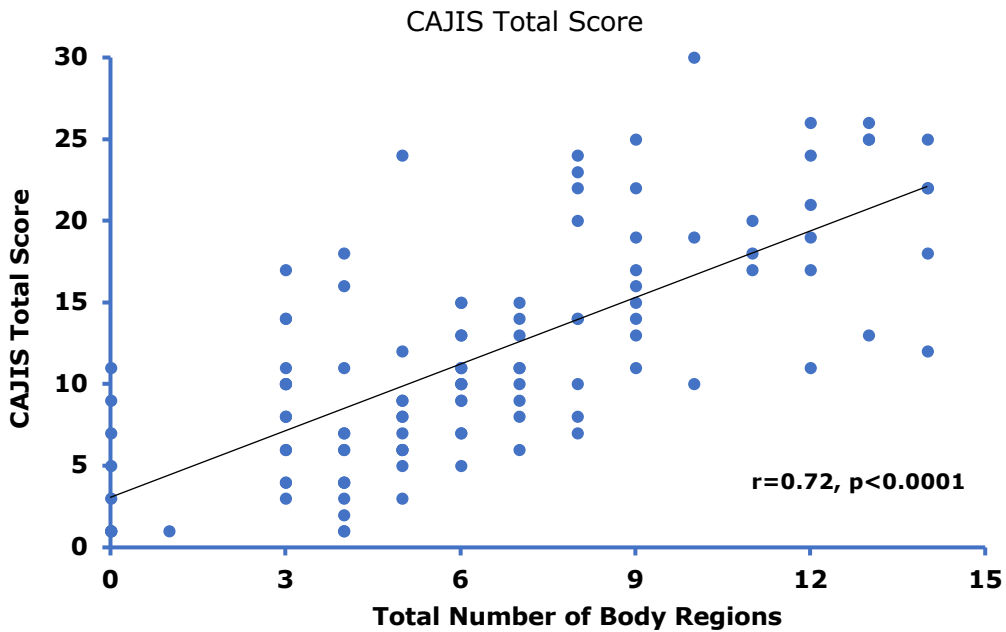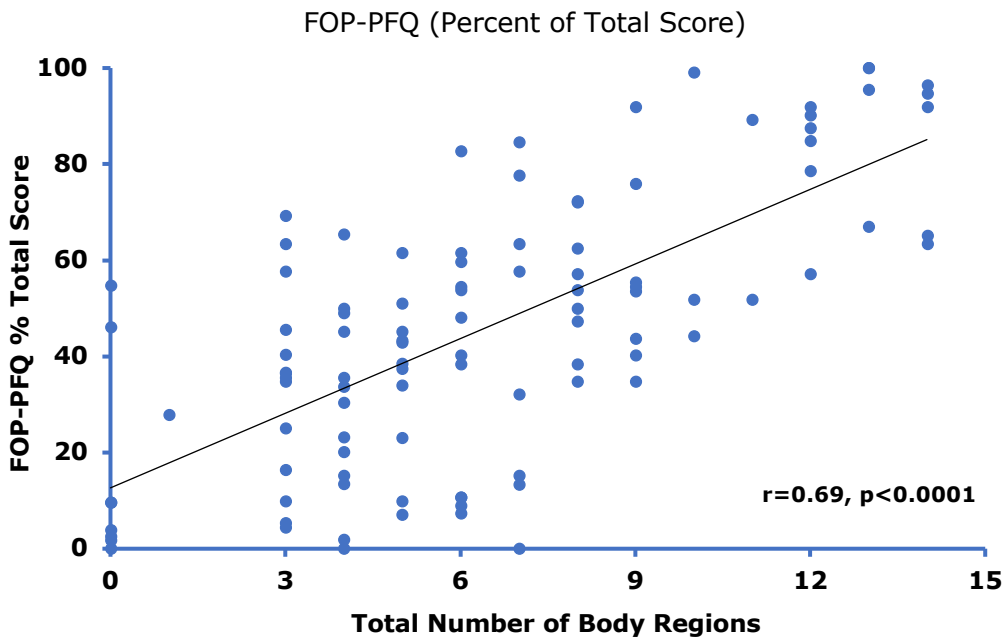

Supplement: MOESM1 [file 16699446]
